# Supplementary material for: Respiratory-tract infections among geriatrics: prevalence and factors associated with the treatment outcomes
Source: PubMed Central journal article supplement — Ther Adv Respir Dis. 2021 Apr 28;15:1753466620971141. doi: 10.1177/1753466620971141 (PMC8108383; doi:10.1177/1753466620971141), 2021-04-28
Supplement: sj-pdf-2-tar-10.1177_1753466620971141.pdf [file sj-pdf-2-tar-10.1177_1753466620971141.pdf]

## Author Response 2

Reviewer: 1

### Comments to the Author

Lines 24-31 in the results section are better to be in the methods section rather than in the results section.

Dear Sir, the lines you are referring to are related to results section, in methods I have also mentioned briefly about the binary and multiple logistic regression analysis.

In the results section, "treatment outcomes" term is a bit ambiguous, I suggest to restate as RTI improvement. Same in the title of table 5.

Dear Sir, I have restated as you said.

Reviewer: 2

### Comments to the Author

In their conclusion, "Prevalence of community acquired pneumonia (65.6%) among geriatrics is quite high than other respiratory tract infections." is little bit awkward. "Prevalence of community acquired pneumonia (65.6%) among older patients aged 65 years and older is quite high than other respiratory tract infections" may be better.

Dear Sir, I have changed the sentence as you said.
