# Supplementary material for: Respiratory-tract infections among geriatrics: prevalence and factors associated with the treatment outcomes
Source: PubMed Central journal article supplement — Ther Adv Respir Dis. 2021 Apr 28;15:1753466620971141. doi: 10.1177/1753466620971141 (PMC8108383; doi:10.1177/1753466620971141), 2021-04-28
Supplement: sj-pdf-4-tar-10.1177_1753466620971141.pdf [file sj-pdf-4-tar-10.1177_1753466620971141.pdf]

Reviewer 1 v.2

Comments to the Author

Lines 24-31 in the results section are better to be in the methods section rather than in the results section.

In the results section, "treatment outcomes" term is a bit ambiguous, I suggest to restate as RTI improvement. Same in the title of table 5.
