# Supplementary material for: Respiratory-tract infections among geriatrics: prevalence and factors associated with the treatment outcomes
Source: PubMed Central journal article supplement — Ther Adv Respir Dis. 2021 Apr 28;15:1753466620971141. doi: 10.1177/1753466620971141 (PMC8108383; doi:10.1177/1753466620971141), 2021-04-28
Supplement: sj-pdf-6-tar-10.1177_1753466620971141.pdf [file sj-pdf-6-tar-10.1177_1753466620971141.pdf]

Reviewer 2 v.2

Comments to the Author

In their conclusion, "Prevalence of community acquired pneumonia (65.6%) among geriatrics is quite high than other respiratory tract infections." is little bit awkward. "Prevalence of community acquired pneumonia (65.6%) among older patients aged 65 years and older is quite high than other respiratory tract infections" may be better.
